# Supplementary material for: Theoretical study on the light harvesting efficiency of zinc porphyrin sensitizers for DSSCs
Source: Royal Society of Chemistry journal article supplement (doi:10.1039/c4ra02473g), 2014-01-01
Supplement: c4ra02473g1.pdf [file c4ra02473g1.pdf]

## Supplementary Material

### Theoretical Study on the Light Harvesting Efficiency of Zinc Porphyrin Sensitizers for DSSCs

Kadali Chaitanya<sup>1</sup>, Xue-Hai Ju\*,<sup>1</sup>, and B. Mark Heron<sup>2</sup>

Key Laboratory of Soft Chemistry and Functional Materials of MOE, School of Chemical Engineering, Nanjing University of Science and Technology, Nanjing, P. R. China, 210094

<sup>2</sup>Department of Chemical and Biological Sciences, School of Applied Sciences, University of Huddersfield, Queensgate, Huddersfield, HD1 3DH, UK.

**Table S1:** Calculated singlet excitation energies and oscillator strengths of JC1 – 6 and YD2-o-C8 dyes.

| Molecule | No. | Energy (cm <sup>-1</sup> ) | Wavelength (nm) | Osc. Strength | Symmetry  | Major contribs                                                       |
|----------|-----|----------------------------|-----------------|---------------|-----------|----------------------------------------------------------------------|
|          | 1   | 16107.003                  | 620.84796       | 0.2985        | Singlet-A | H-1->L+1 (24%), HOMO->LUMO (70%)                                     |
|          | 2   | 16827.261                  | 594.27377       | 0.0061        | Singlet-A | H-1->LUMO (53%), HOMO->L+1 (40%)                                     |
|          | 3   | 21504.503                  | 465.01889       | 0.3637        | Singlet-A | H-2->LUMO (49%), H-1->L+1 (25%), HOMO->LUMO (17%)                    |
| YD2-o-C8 | 4   | 23495.093                  | 425.62079       | 1.0563        | Singlet-A | H-1->LUMO (40%), HOMO->L+1 (59%)                                     |
|          | 5   | 23850.786                  | 419.2734        | 1.8612        | Singlet-A | H-2->LUMO (36%), H-1->L+1 (45%)                                      |
|          | 6   | 26642.29                   | 375.34311       | 0.3161        | Singlet-A | H-2->L+1 (90%)                                                       |
|          | 7   | 29832.235                  | 335.20787       | 0.017         | Singlet-A | H-13->LUMO (14%), H-12->LUMO (39%), H-5->LUMO (11%), HOMO->L+2 (13%) |
|          | 8   | 30175.023                  | 331.39992       | 0.0099        | Singlet-A | H-14->LUMO (11%), H-12->LUMO (16%), H-5->LUMO (12%), HOMO->L+2 (30%) |
|          | 9   | 30811.399                  | 324.55521       | 0.0284        | Singlet-A | H-11->LUMO (48%), H-7->LUMO (17%)                                    |
|          | 10  | 31304.207                  | 319.44588       | 0.0402        | Singlet-A | H-14->LUMO (25%), H-11->L+1 (13%), H-5->LUMO (19%), HOMO->L+2 (18%)  |

|     | No. | Energy (cm-1) | Wavelength (nm) | Osc. Strength | Symmetry  | Major contribs                                                     |
|-----|-----|---------------|-----------------|---------------|-----------|--------------------------------------------------------------------|
|     | 1   | 16589.326     | 602.79724       | 0.2727        | Singlet-A | H-1->L+1 (29%), HOMO->LUMO (67%)                                   |
|     | 2   | 17053.905     | 586.37598       | 0.004         | Singlet-A | H-1->LUMO (53%), HOMO->L+1 (43%)                                   |
|     | 3   | 23391.853     | 427.49926       | 2.3931        | Singlet-A | H-1->L+1 (65%), HOMO->LUMO (30%)                                   |
|     | 4   | 24271.81      | 412.00059       | 1.376         | Singlet-A | H-1->LUMO (45%), HOMO->L+1 (54%)                                   |
| JC1 | 5   | 26775.372     | 373.47753       | 0.0108        | Singlet-A | H-2->LUMO (81%)                                                    |
|     | 6   | 29942.733     | 333.97085       | 0.0123        | Singlet-A | H-11->LUMO (24%), H-6->LUMO (13%), H-2->L+1 (16%), HOMO->L+2 (23%) |
|     | 7   | 30006.452     | 333.26166       | 0.0042        | Singlet-A | H-11->LUMO (10%), H-2->L+1 (62%)                                   |
|     | 8   | 30205.672     | 331.06365       | 0.0019        | Singlet-A | H-11->LUMO (54%), HOMO->L+2 (17%)                                  |
|     | 9   | 30965.452     | 322.94055       | 0.0348        | Singlet-A | H-12->L+1 (12%), H-10->LUMO (40%), H-7->LUMO (13%), H-2->L+1 (10%) |
|     | 10  | 31363.892     | 318.83798       | 0.0286        | Singlet-A | H-12->LUMO (11%), H-11->L+1 (45%), H-10->L+1 (10%)                 |
|     |     |               |                 |               |           |                                                                    |
|     | No. | Energy (cm-1) | Wavelength (nm) | Osc. Strength | Symmetry  | Major contribs                                                     |
|     | 1   | 16458.663     | 607.58275       | 0.3294        | Singlet-A | H-1->L+1 (27%), HOMO->LUMO (67%)                                   |
|     | 2   | 17005.511     | 588.04466       | 0.0046        | Singlet-A | H-1->LUMO (52%), HOMO->L+1 (42%)                                   |
|     | 3   | 22801.451     | 438.56858       | 2.3421        | Singlet-A | H-1->L+1 (59%), HOMO->LUMO (27%)                                   |
|     | 4   | 24158.085     | 413.94009       | 1.3302        | Singlet-A | H-1->LUMO (44%), HOMO->L+1 (54%)                                   |
| JC2 | 5   | 26389.03      | 378.94534       | 0.0199        | Singlet-A | H-2->LUMO (61%), HOMO->L+2 (14%)                                   |
|     | 6   | 27975.534     | 357.4552        | 0.0122        | Singlet-A | H-3->LUMO (10%), H-2->LUMO (22%), H-1->L+1 (11%), HOMO->L+2 (40%)  |
|     | 7   | 29970.963     | 333.65628       | 0.0012        | Singlet-A | H-2->L+1 (73%)                                                     |
|     | 8   | 30016.13      | 333.1542        | 0.005         | Singlet-A | H-12->LUMO (46%), H-3->LUMO (25%), HOMO->L+2 (13%)                 |
|     | 9   | 30154.859     | 331.62152       | 0.003         | Singlet-A | H-12->LUMO (39%), H-3->LUMO (31%), HOMO->L+2 (12%)                 |
|     | 10  | 30858.986     | 324.05472       | 0.0196        | Singlet-A | H-11->LUMO (37%), H-9->L+1 (10%), H-7->LUMO (17%), H-2->L+1 (12%)  |
|     |     |               |                 |               |           |                                                                    |
|     | No. | Energy (cm-1) | Wavelength (nm) | Osc. Strength | Symmetry  | Major contribs                                                     |

|     |     |               |                 |               |           |                                                                                     |
|-----|-----|---------------|-----------------|---------------|-----------|-------------------------------------------------------------------------------------|
|     | 1   | 16311.869     | 613.05052       | 0.4262        | Singlet-A | H-1->L+1 (23%), HOMO->LUMO (68%)                                                    |
|     | 2   | 17035.354     | 587.01452       | 0.0045        | Singlet-A | H-1->LUMO (48%), HOMO->L+1 (40%)                                                    |
|     | 3   | 21297.217     | 469.54492       | 1.3907        | Singlet-A | H-3->LUMO (16%), H-1->L+1 (35%), HOMO->LUMO (17%), HOMO->L+2 (19%)                  |
|     | 4   | 24093.56      | 415.04866       | 1.2147        | Singlet-A | H-1->LUMO (44%), HOMO->L+1 (53%)                                                    |
| JC3 | 5   | 24863.019     | 402.20378       | 0.7138        | Singlet-A | H-3->LUMO (18%), H-2->LUMO (15%), H-1->L+1 (33%), HOMO->LUMO (10%), HOMO->L+2 (14%) |
|     | 6   | 26751.982     | 373.80408       | 0.0436        | Singlet-A | H-3->LUMO (14%), H-2->LUMO (22%), HOMO->L+2 (48%)                                   |
|     | 7   | 26945.556     | 371.1187        | 0.0043        | Singlet-A | H-3->LUMO (29%), H-2->LUMO (40%)                                                    |
|     | 8   | 29603.978     | 337.79244       | 0.1086        | Singlet-A | H-2->L+1 (11%), H-1->L+2 (75%)                                                      |
|     | 9   | 29937.894     | 334.02483       | 0.006         | Singlet-A | H-2->L+1 (68%), H-1->L+2 (11%)                                                      |
|     | 10  | 29969.35      | 333.67424       | 0.0182        | Singlet-A | H-13->LUMO (50%), H-13->L+2 (10%), H-3->L+2 (18%)                                   |
|     |     |               |                 |               |           |                                                                                     |
|     | No. | Energy (cm-1) | Wavelength (nm) | Osc. Strength | Symmetry  | Major contribs                                                                      |
|     | 1   | 16021.508     | 624.16098       | 0.4232        | Singlet-A | H-1->L+1 (17%), HOMO->LUMO (75%)                                                    |
|     | 2   | 17215.217     | 580.88145       | 0.0008        | Singlet-A | H-1->LUMO (43%), HOMO->L+1 (47%)                                                    |
|     | 3   | 20919.747     | 478.01726       | 0.0955        | Singlet-A | H-2->LUMO (60%), H-1->L+1 (17%), HOMO->LUMO (11%)                                   |
|     | 4   | 23514.45      | 425.27041       | 0.8064        | Singlet-A | H-1->LUMO (40%), HOMO->L+1 (52%)                                                    |
|     | 5   | 24397.633     | 409.87582       | 2.0609        | Singlet-A | H-2->LUMO (23%), H-1->L+1 (57%)                                                     |
| JC4 | 6   | 26244.656     | 381.02995       | 0.6258        | Singlet-A | H-2->L+1 (81%), H-1->LUMO (13%)                                                     |
|     | 7   | 30032.262     | 332.97526       | 0.0107        | Singlet-A | H-2->L+2 (12%), HOMO->L+2 (54%)                                                     |
|     | 8   | 31201.774     | 320.4946        | 0.0319        | Singlet-A | H-11->L+1 (11%), H-10->LUMO (46%), H-7->LUMO (14%)                                  |
|     | 9   | 31653.447     | 315.92136       | 0.0105        | Singlet-A | H-11->LUMO (25%), H-10->L+1 (12%), H-6->LUMO (31%), HOMO->L+2 (10%)                 |
|     | 10  | 31981.717     | 312.67865       | 0.0648        | Singlet-A | H-9->LUMO (47%), H-3->LUMO (11%), H-3->L+1 (14%)                                    |
|     |     |               |                 |               |           |                                                                                     |
|     | No. | Energy (cm-1) | Wavelength (nm) | Osc. Strength | Symmetry  | Major contribs                                                                      |
|     | 1   | 15890.845     | 629.29315       | 0.495         | Singlet-A | H-1->L+1 (15%), HOMO->LUMO (74%)                                                    |
|     | 2   | 17215.217     | 580.88145       | 0.0003        | Singlet-A | H-1->LUMO (42%), HOMO->L+1 (46%)                                                    |

|     |     |                  |                    |                  |           |                                                                  |
|-----|-----|------------------|--------------------|------------------|-----------|------------------------------------------------------------------|
|     | 3   | 20772.146        | 481.4139           | 0.063            | Singlet-A | H-2->LUMO (60%), H-1->L+1 (15%)                                  |
|     | 4   | 23490.253        | 425.70848          | 0.809            | Singlet-A | H-1->LUMO (39%), HOMO->L+1 (53%)                                 |
| JC5 | 5   | 23620.11         | 423.36806          | 2.0018           | Singlet-A | H-2->LUMO (18%), H-1->L+1 (49%), HOMO->L+2 (11%)                 |
|     | 6   | 26180.938        | 381.95729          | 0.5492           | Singlet-A | H-2->L+1 (82%), H-1->LUMO (12%)                                  |
|     | 7   | 27969.081        | 357.53767          | 0.0578           | Singlet-A | H-2->L+2 (15%), H-1->L+1 (17%), HOMO->L+2 (49%)                  |
|     | 8   | 29980.642        | 333.54856          | 0.0169           | Singlet-A | H-3->LUMO (65%), HOMO->L+2 (16%)                                 |
|     | 9   | 31142.088        | 321.10885          | 0.032            | Singlet-A | H-11->LUMO (42%), H-10->L+1 (16%), H-7->LUMO (17%)               |
|     | 10  | 31661.513        | 315.84088          | 0.0368           | Singlet-A | H-11->L+1 (11%), H-10->LUMO (44%)                                |
|     |     |                  |                    |                  |           |                                                                  |
|     | No. | Energy<br>(cm-1) | Wavelength<br>(nm) | Osc.<br>Strength | Symmetry  | Major contribs                                                   |
|     | 1   | 15715.822        | 636.30145          | 0.5535           | Singlet-A | HOMO->LUMO (73%)                                                 |
|     | 2   | 17145.852        | 583.23143          | 0.0011           | Singlet-A | H-2->LUMO (21%), H-1->LUMO (18%), HOMO->L+1 (48%)                |
|     | 3   | 20822.96         | 480.23913          | 0.0152           | Singlet-A | H-2->LUMO (29%), H-1->LUMO (35%)                                 |
|     | 4   | 21890.845        | 456.81197          | 1.315            | Singlet-A | H-3->LUMO (16%), H-2->L+1 (18%), H-1->L+1 (16%), HOMO->L+2 (17%) |
| JC6 | 5   | 23366.043        | 427.97148          | 0.7885           | Singlet-A | H-2->LUMO (22%), H-1->LUMO (18%), HOMO->L+1 (50%)                |
|     | 6   | 26039.79         | 384.02768          | 0.4715           | Singlet-A | H-3->LUMO (10%), H-1->L+1 (58%)                                  |
|     | 7   | 26106.734        | 383.04293          | 0.4283           | Singlet-A | H-3->LUMO (31%), H-2->L+1 (43%)                                  |
|     | 8   | 26493.883        | 377.44562          | 0.1696           | Singlet-A | H-3->LUMO (18%), HOMO->L+2 (54%)                                 |
|     | 9   | 30337.948        | 329.62019          | 0.1193           | Singlet-A | H-2->L+2 (47%), H-1->L+2 (38%)                                   |
|     | 10  | 30472.643        | 328.16319          | 0.0532           | Singlet-A | H-3->LUMO (16%), H-3->L+2 (44%)                                  |

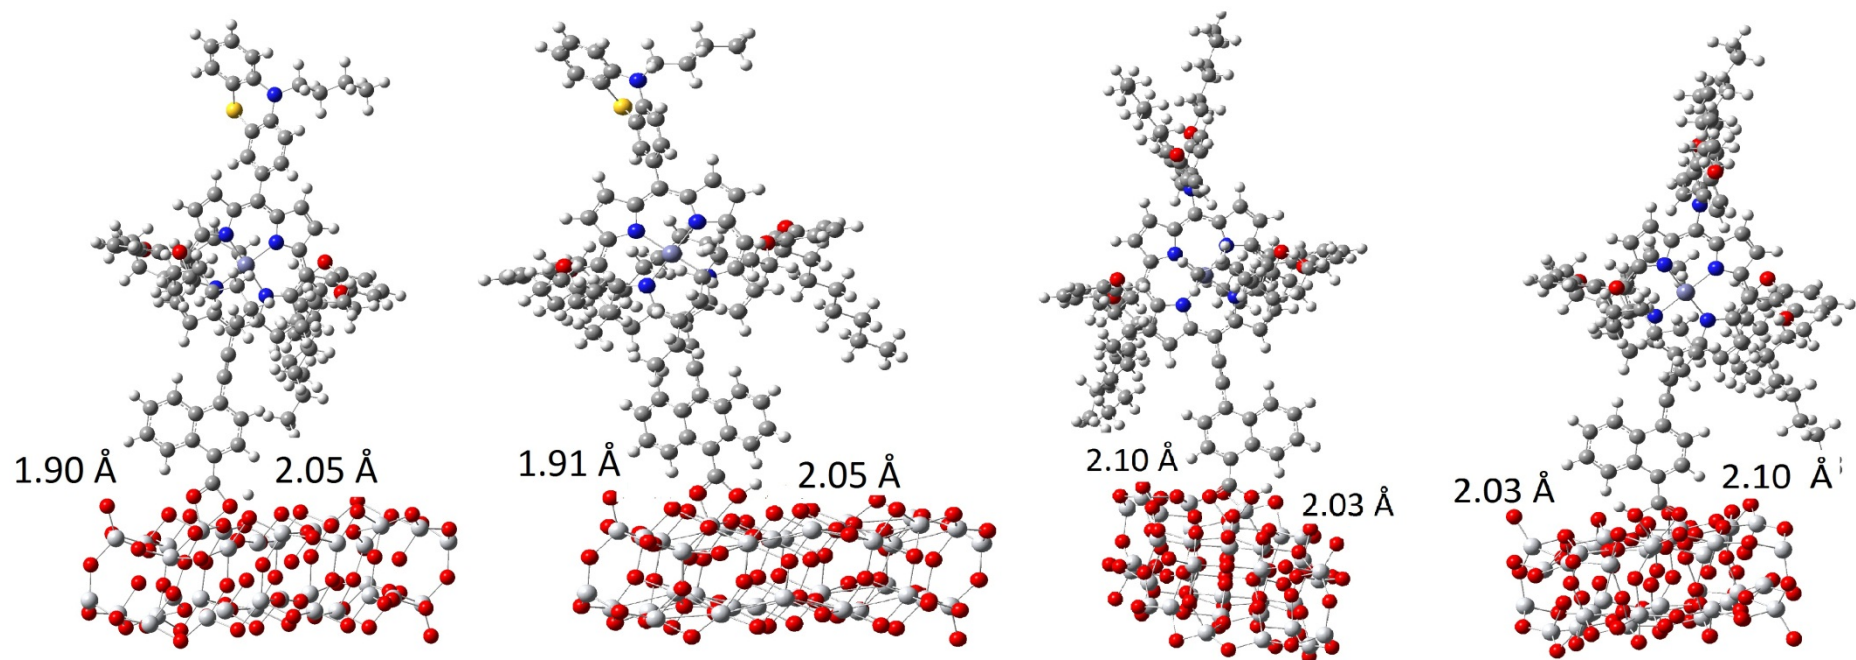

**Figure S1.** Optimized bidentate chelate bridging mode of JC2, JC3, JC5 and JC6 dyes on the  $(\text{TiO}_2)_{36}$  cluster calculated by PBE/DNP on DMol3 program.

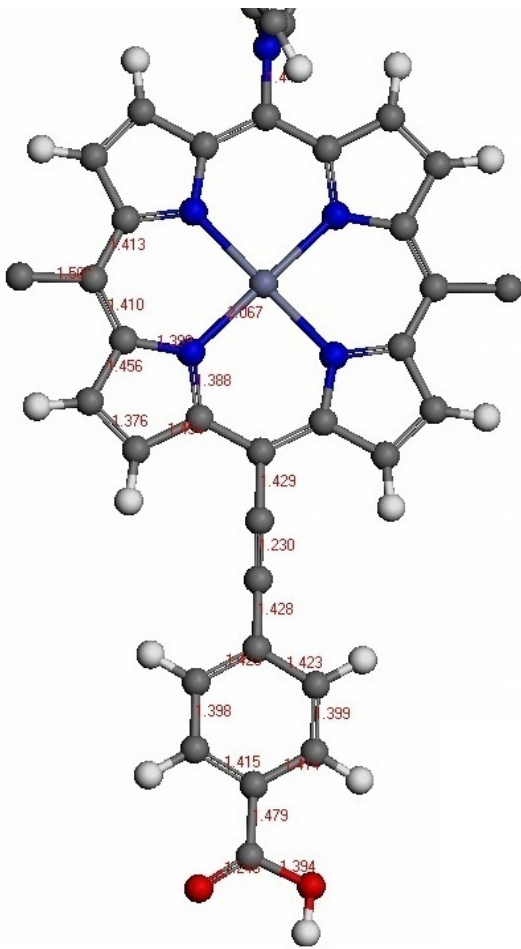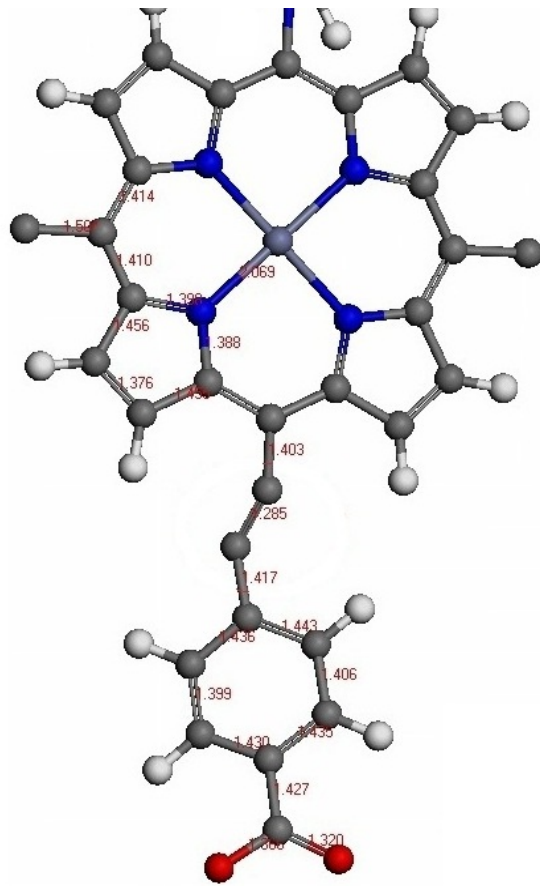

optimized geometry parameter of YD2-o-C8 dye      optimized geometry parameter of YD2-o-C8 dye on TiO<sub>2</sub> slab

Figure S2: optimized geometry structures of YD2-o-C8 dye before and after adsorption of dye on TiO<sub>2</sub> surface ( $E_{\text{dye}} = -6228.33$  a.u.,  $E_{\text{dye}+\text{TiO}_2} = -42196.3$  a.u.) calculated at GGA/PBE/DNP level using Dmol<sup>3</sup>

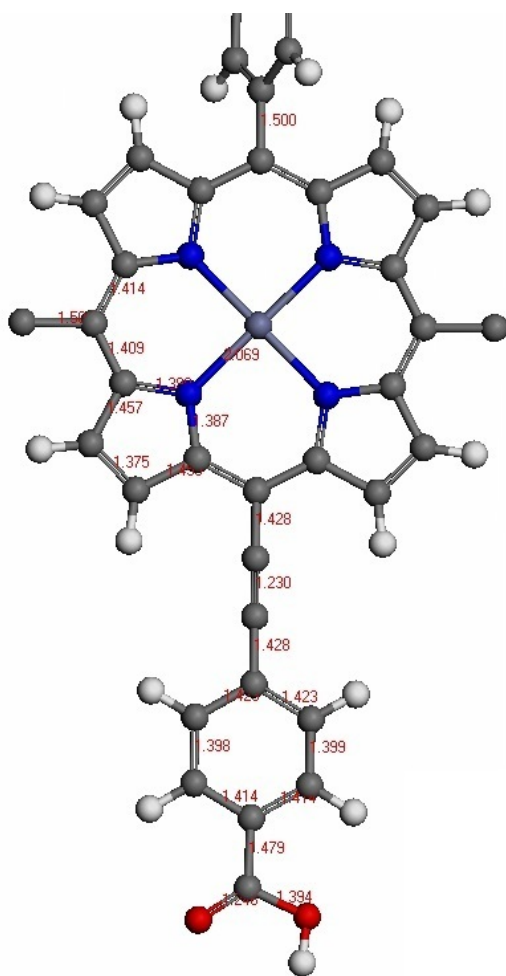

optimized geometry parameter of JC 1 dye

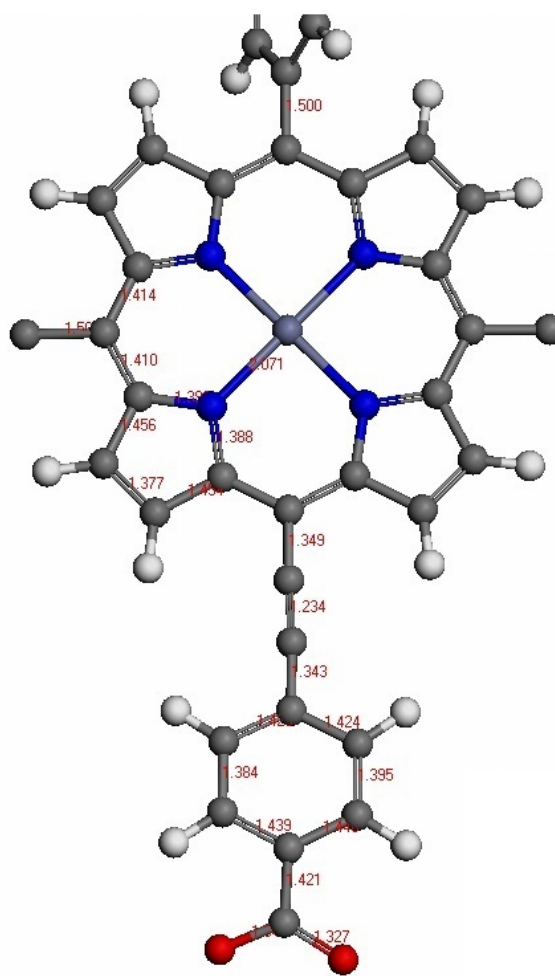

optimized geometry parameter of JC 1 dye on TiO<sub>2</sub> slab

Figure S3: optimized geometry structures of JC1 dye before and after adsorption of dye on TiO<sub>2</sub> surface ( $E_{\text{dye}} = -6314.93$  a.u,  $E_{\text{dye}+\text{TiO}_2} = -42196.3$  a.u) calculated at GGA/PBE/DNP level using Dmol<sup>3</sup>

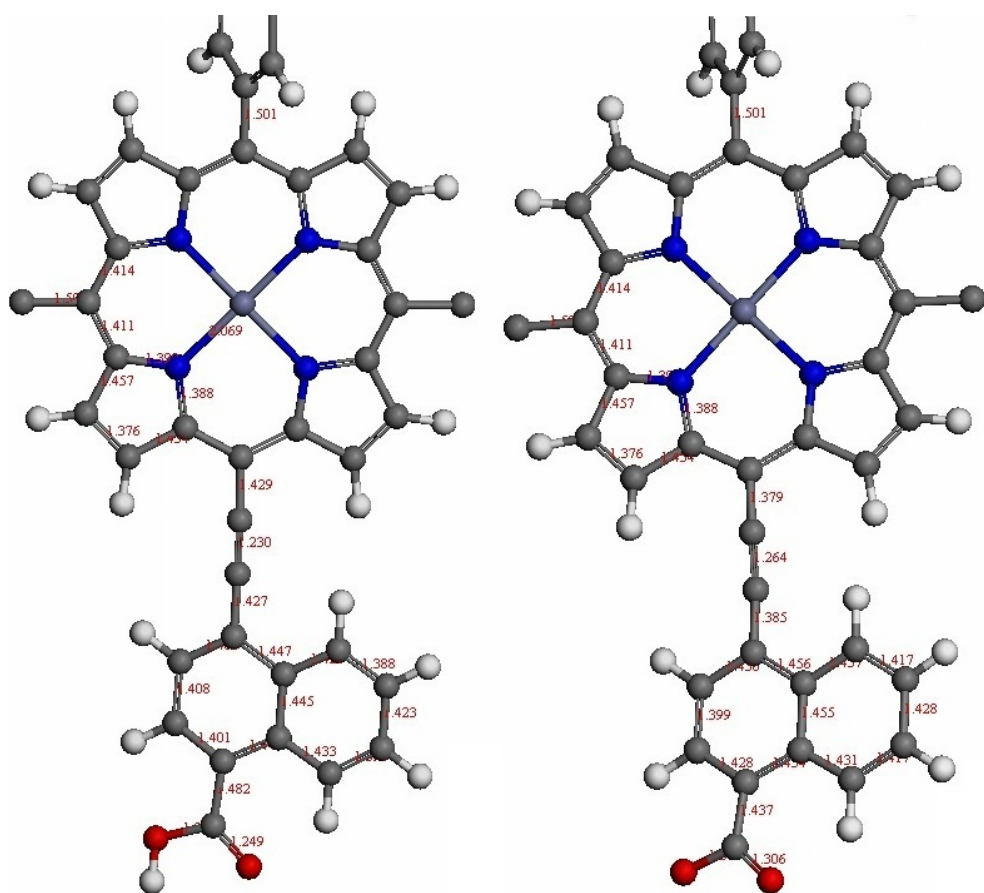

optimized geometry parameter of JC 2 dye    optimized geometry parameter of JC 2 dye on  $\text{TiO}_2$  slab

Figure S4: optimized geometry structures of JC2 dye before and after adsorption of dye on  $\text{TiO}_2$  surface ( $E_{\text{dye}} = -6467.1$  a.u.,  $E_{\text{dye}+\text{TiO}_2} = -42435.1$  a.u) calculated at GGA/PBE/DNP level using Dmol<sup>3</sup>



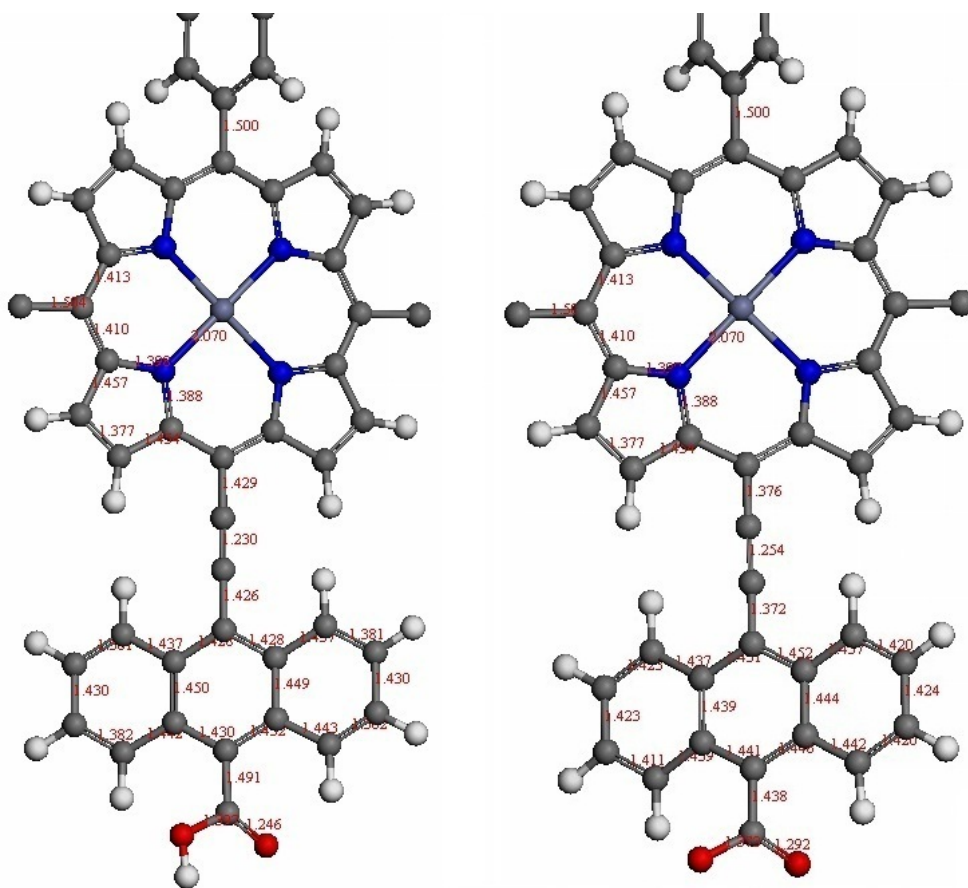

optimized geometry parameter of JC 3 dye

optimized geometry parameter of JC 3 dye on TiO<sub>2</sub> slab

Figure S5: optimized geometry structures of JC3 dye before and after adsorption of dye on TiO<sub>2</sub> surface ( $E_{\text{dye}} = -6619.27$  a.u,  $E_{\text{dye}+\text{TiO}_2} = -42587.2$  a.u) calculated at GGA/PBE/DNP level using Dmol<sup>3</sup>

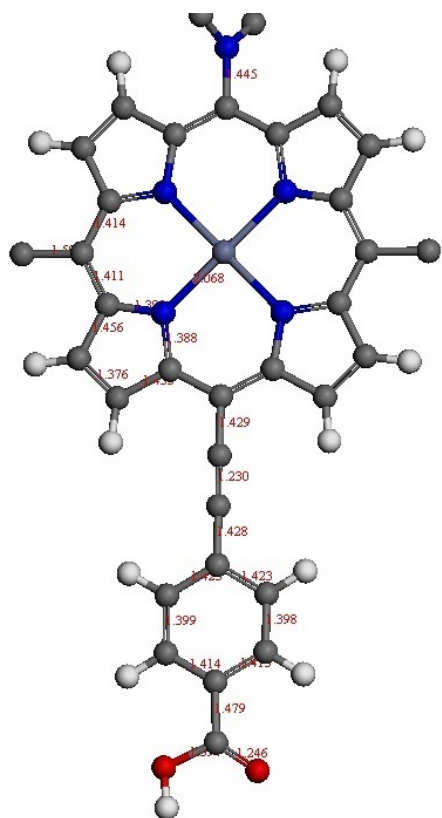

optimized geometry parameter of JC 4 dye

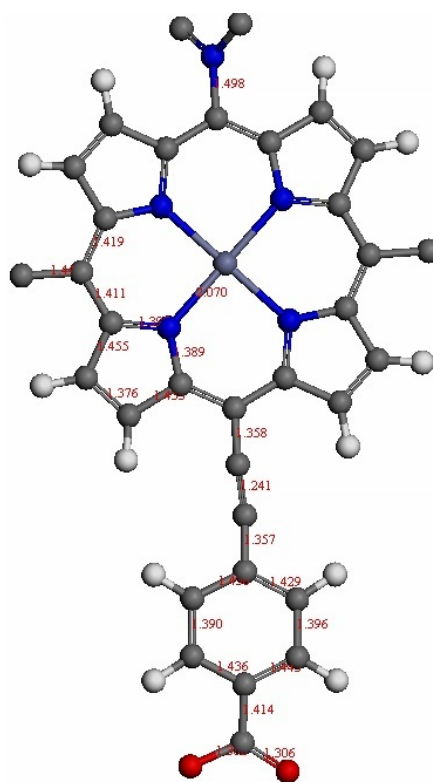

optimized geometry parameter of JC 4 dye on TiO<sub>2</sub> slab

Figure S6: optimized geometry structures of JC4 dye before and after adsorption of dye on TiO<sub>2</sub> surface ( $E_{\text{dye}} = -6378.33$  a.u,  $E_{\text{dye}+\text{TiO}_2} = -42346.3$ a.u) calculated at GGA/PBE/DNP level using Dmol<sup>3</sup>

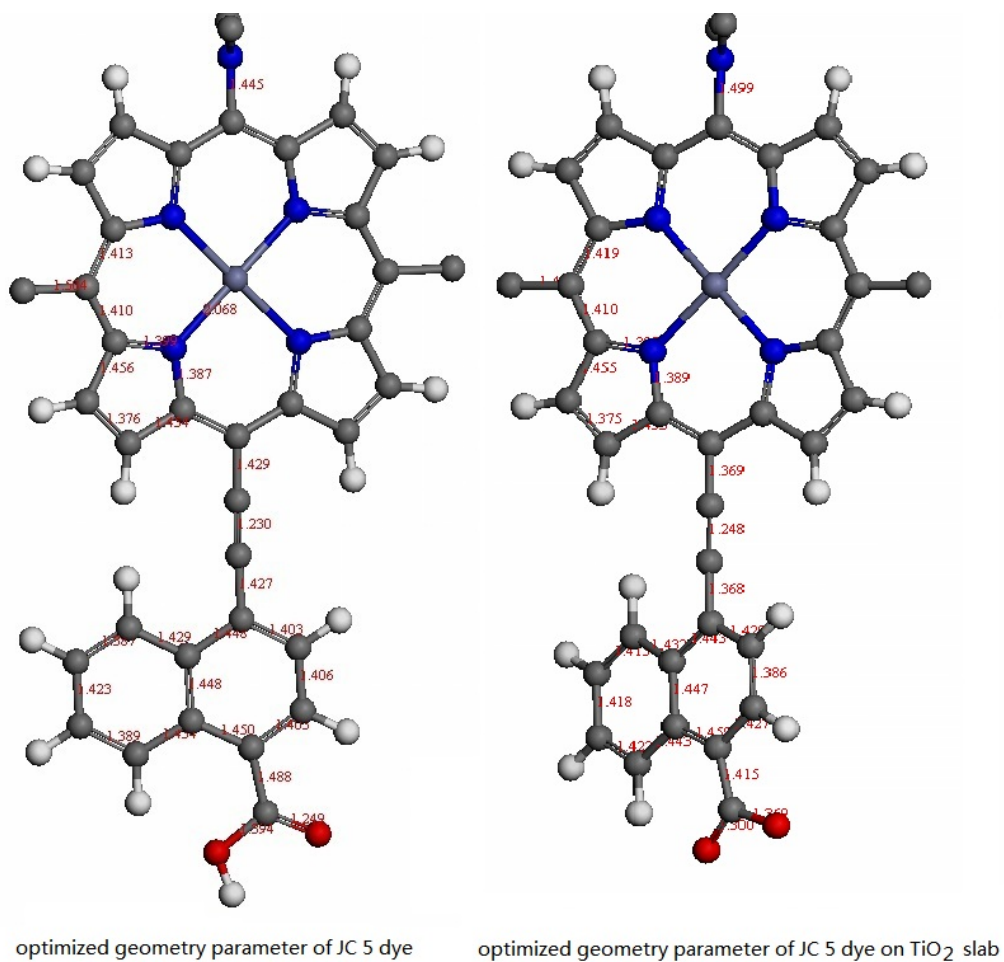

Figure S7: optimized geometry structures of JC5 dye before and after adsorption of dye on TiO<sub>2</sub> surface ( $E_{\text{dye}} = -6530.5$  a.u.,  $E_{\text{dye}+\text{TiO}_2} = -42498.5$  a.u.) calculated at GGA/PBE/DNP level using Dmol<sup>3</sup>

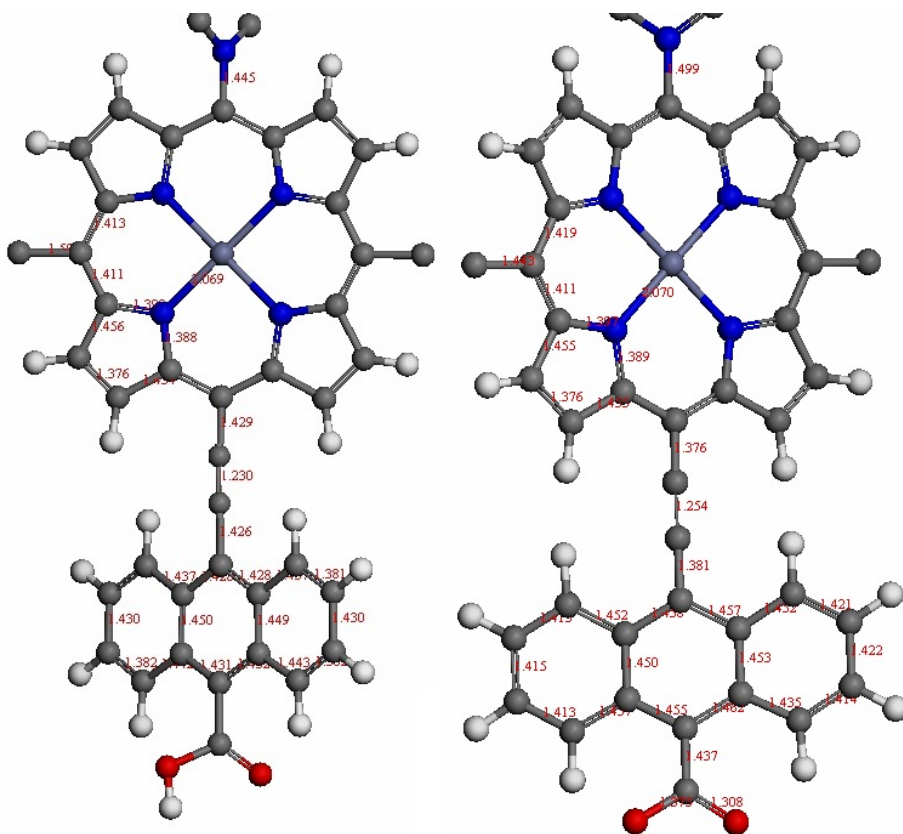

optimized geometry parameter of JC 6 dye    optimized geometry parameter of JC 6 dye on TiO<sub>2</sub> slab

Figure S8: optimized geometry structures of JC6 dye before and after adsorption of dye on TiO<sub>2</sub> surface ( $E_{\text{dye}} = -6682.68$  a.u,  $E_{\text{dye}+\text{TiO}_2} = -42650.7$  a.u) calculated at GGA/PBE/DNP level using Dmol<sup>3</sup>

### Other supporting material

**Table S2.** The reorganization energies of the dyes JC1 – 6 calculated at the B3LYP/LanL2dZ level of theory.

| Molecule  | E0 g0        | E- g-        | E+ g+        | E- g0        | E+ g0        | E0 g-        | E0 g+        | hole (a.u) | electron (a.u) | hole (eV)   | electron (eV) |
|-----------|--------------|--------------|--------------|--------------|--------------|--------------|--------------|------------|----------------|-------------|---------------|
| reference | -4559.283369 | -4559.355387 | -4559.077825 | -4559.279311 | -4559.279703 | -4559.349706 | -4559.07385  | 0.00764052 | 0.00973932     | 0.207909215 | 0.265020493   |
| JC1       | -4253.709953 | -4253.781616 | -4253.510797 | -4253.705758 | -4253.717701 | -4253.777567 | -4253.494257 | 0.00879124 | 0.00824302     | 0.239221913 | 0.224304081   |
| JC2       | -4407.325646 | -4407.402038 | -4407.124497 | -4407.324712 | -4407.329867 | -4407.39471  | -4407.111331 | 0.00894416 | 0.00826071     | 0.24338308  | 0.224785451   |
| JC3       | -4560.927962 | -4561.005538 | -4560.736615 | -4560.922696 | -4560.937692 | -4560.998809 | -4560.714949 | 0.01193566 | 0.01199543     | 0.324785971 | 0.326412396   |
| JC4       | -4709.686221 | -4709.757129 | -4709.485516 | -4709.682188 | -4709.481024 | -4709.752454 | -4709.682367 | 0.008347   | 0.00870875     | 0.227133522 | 0.236977245   |
| JC5       | -4863.298624 | -4863.372842 | -4863.097964 | -4863.294405 | -4863.093942 | -4863.368056 | -4863.294631 | 0.0080152  | 0.0090061      | 0.218104781 | 0.245068554   |
| JC6       | -5016.904667 | -5016.980915 | -5016.705088 | -5016.898794 | -5016.701172 | -5016.975085 | -5016.900808 | 0.0077754  | 0.01170251     | 0.211579488 | 0.318441634   |

**Table S3.** The adsorption energies of the dyes JC1 – 6 calculated at the PBE/DNP level of theory using Dmol<sup>3</sup> program.

| Molecule  | $E_{\text{TiO}_2}$ (a.u) | $E_{\text{dye}}$ (a.u) | $E_{\text{dye} + \text{TiO}_2}$ (a.u) | $E_{\text{ads}}$ (a.u) | $E_{\text{ads}}$ (kcal/mol) |
|-----------|--------------------------|------------------------|---------------------------------------|------------------------|-----------------------------|
| reference | -35968                   | -6228.33               | -42196.3                              | -0.02244               | -14.1387                    |
| JC1       | -35968                   | -6314.93               | -42282.9                              | -0.02071               | -13.0459                    |
| JC2       | -35968                   | -6467.1                | -42435.1                              | -0.02146               | -13.5197                    |
| JC3       | -35968                   | -6619.27               | -42587.2                              | -0.02221               | -13.9935                    |
| JC4       | -35968                   | -6378.33               | -42346.3                              | -0.0225                | -14.1742                    |
| JC5       | -35968                   | -6530.5                | -42498.5                              | -0.02325               | -14.6481                    |
| JC6       | -35968                   | -6682.68               | -42650.7                              | -0.024                 | -15.1219                    |

**Table S4.** The first hyperpolarizability components of all the dyes JC1 - 6 calculated at the B3LYP/Lanl2dz level of theory

| Component          | YD2-o-C8 | JC1    | JC2       | JC3     | JC4     | JC5     | JC6      |
|--------------------|----------|--------|-----------|---------|---------|---------|----------|
| $\beta_{xxx}$      | 20036.3  | 67405  | 77692.28  | 74674   | 14414.7 | 15844.9 | 13506.3  |
| $\beta_{xyx}$      | -1044    | -9977  | -9846.118 | -6955.5 | -470.56 | -955.55 | -635.362 |
| $\beta_{xyy}$      | -182.94  | 1938.8 | 1736.132  | 1152.6  | 126.979 | 148.387 | 99.7056  |
| $\beta_{yyy}$      | 202.882  | -641.7 | -570.7503 | -406.23 | 241.675 | 266.402 | 250.643  |
| $\beta_{xxz}$      | -20344   | -9686  | -8135.176 | -6704   | -15722  | -17499  | -15139.9 |
| $\beta_{xyz}$      | 877.822  | 689.98 | 243.8179  | -107.98 | 458.256 | 1057.69 | 785.251  |
| $\beta_{yyz}$      | 316.042  | 4.9522 | 117.7111  | 71.338  | -12.126 | -118.83 | -18.6377 |
| $\beta_{xzz}$      | 19612.6  | 859.47 | 294.2183  | -122.99 | 15971.2 | 17916.6 | 15559.2  |
| $\beta_{yzz}$      | -605.45  | -30.69 | 73.15644  | 19.089  | -596.51 | -1204.5 | -1035.4  |
| $\beta_{zzz}$      | -17723   | -64.8  | 132.8291  | -2.094  | -14361  | -16398  | -14026.9 |
| $B_{\text{total}}$ | 54633    | 71672  | 80776.59  | 76348   | 42866   | 48069   | 41285    |

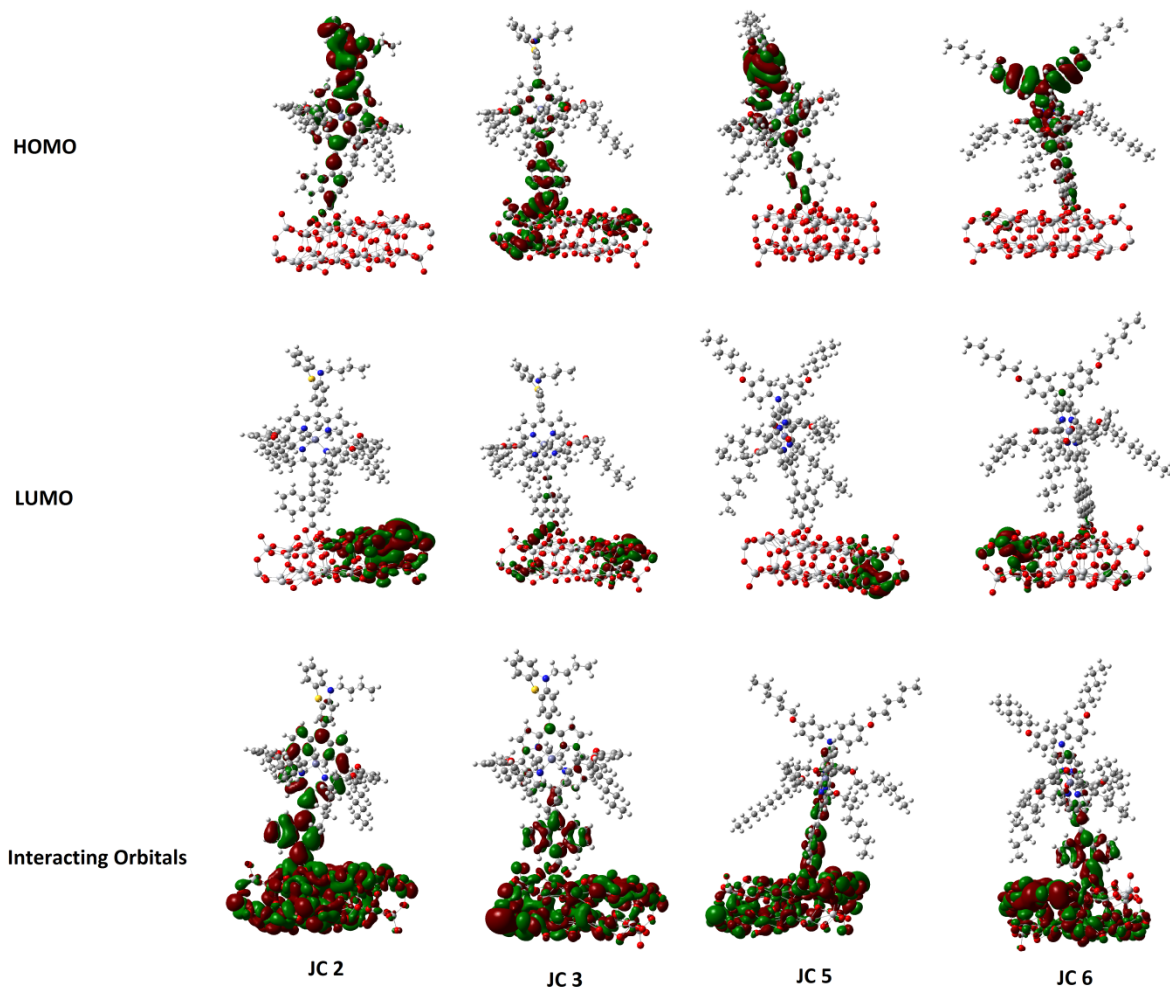

**Figure S9.** (a) HOMO (b) LUMO and (c) interacting orbital isosurfaces of JC2, JC3, JC5 and JC6 dyes on the  $(\text{TiO}_2)_{36}$  nanoparticle. The isovalue is 0.001 a.u.
